# Supplementary material
Source: PubMed Central journal article supplement (PMC3742664)
Supplement: NIHMS459820-supplement-1_si_001.pdf [file NIHMS459820-supplement-1_si_001.pdf]

# **Modularity of select riboswitch expression platform enables facile engineering of novel genetic regulatory devices**

## **Supporting Information**

Pablo Ceres, Andrew D. Garst, Joan G. Marcano-Velázquez, and Robert T. Batey\*

Department of Chemistry and Biochemistry, University of Colorado at Boulder,  
Campus Box 596, Boulder, Colorado 80309-0596

\*Corresponding Author:  
Tel: (303)-735-2159  
Fax: (303)-492-5894  
Email: [robert.batey@colorado.edu](mailto:robert.batey@colorado.edu)



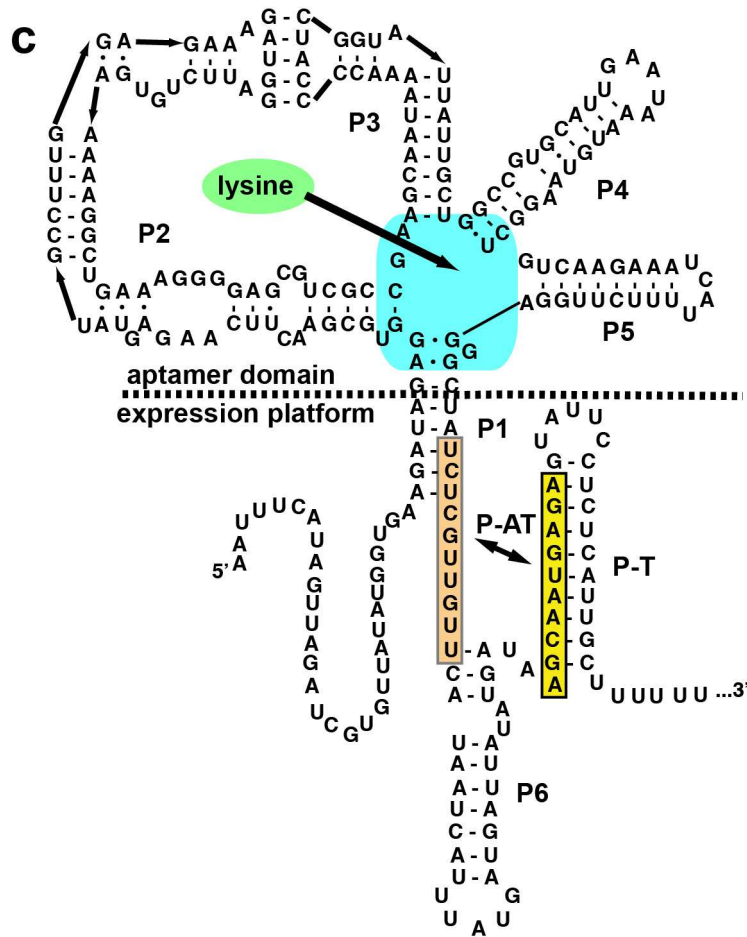

**Supplementary Figure 1, continued.** Sequence and secondary structure of (a) the *Bacillus subtilis metE* SAM-I, (b) *yitJ* SAM-I (b) the *lysC* lysine riboswitches used in this study. Nucleotides directly involved in ligand binding (green) are denoted by cyan rectangles. Sequence involved in formation of alternative secondary structures (P-T, intrinsic terminator; P-AT, antiterminator) are denoted with orange and yellow boxes. The boundary between the two domains as considered in this study to create chimeras is denoted by a dashed line.

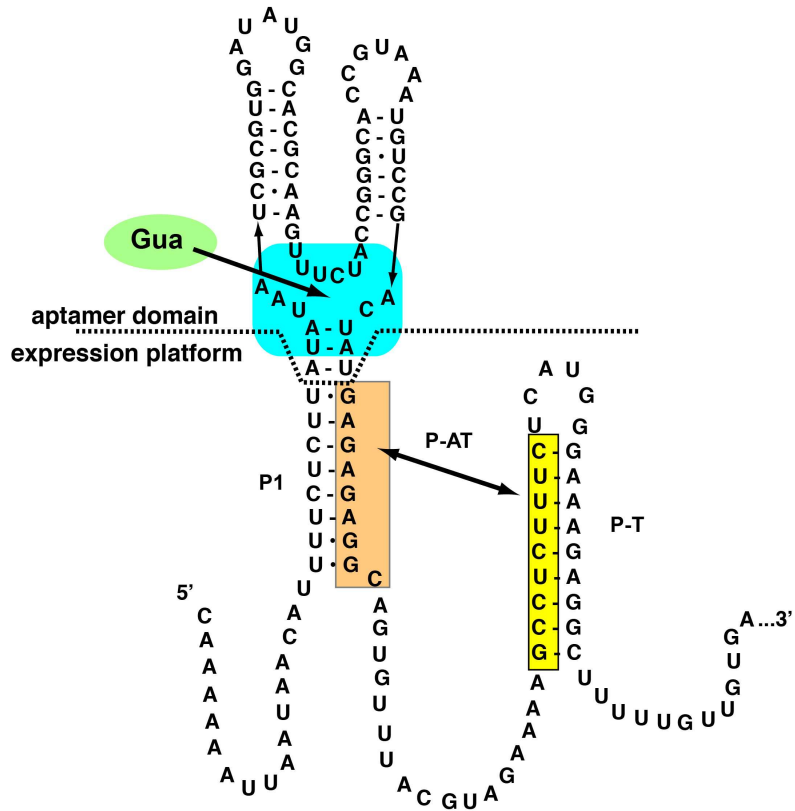

**Supplementary Figure 2.** Sequence and secondary structure of the chimera between the *B. subtilis* *xpt-pbuX* guanine riboswitch aptamer domain and the *B. subtilis* *metE* SAM-I riboswitch expression platform.

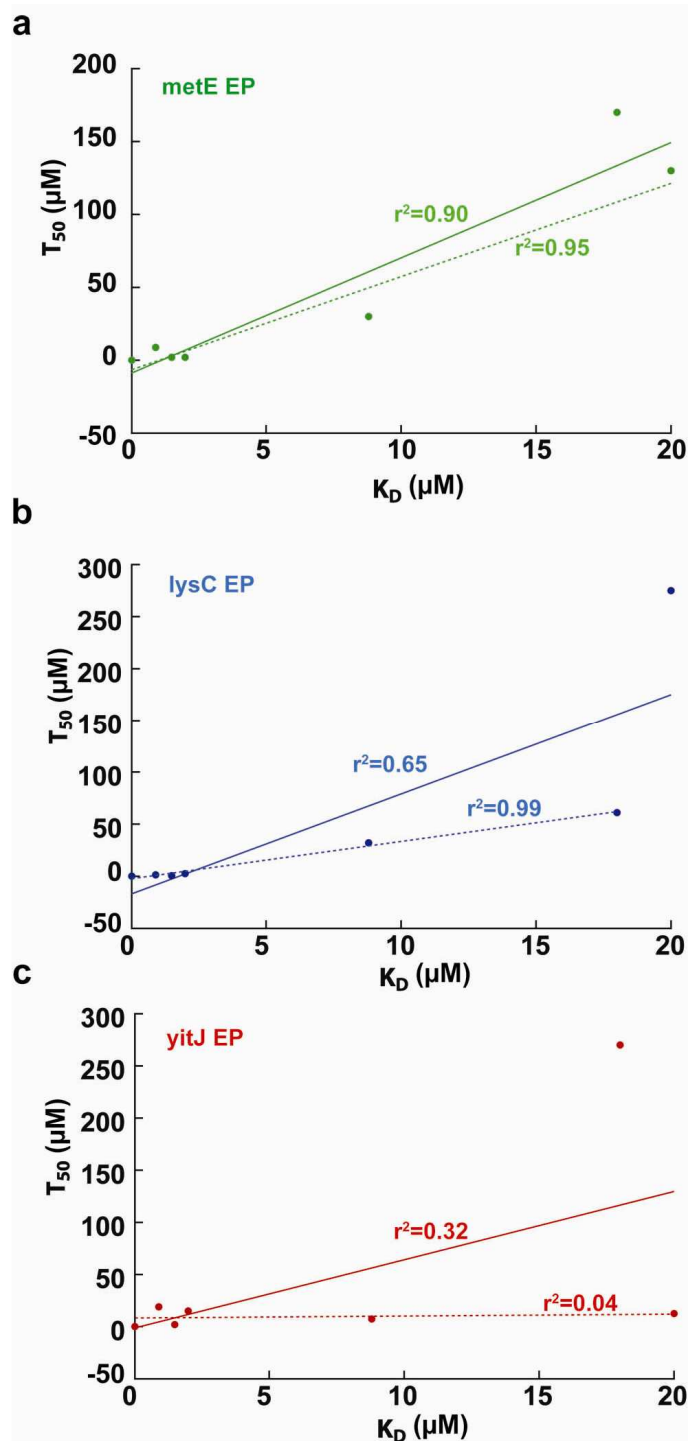

**Supplementary Figure 3.** Comparison of the  $T_{50}$  of each wild type or chimeric riboswitch determined by the in vitro transcription assay and the  $K_D$  of the aptamer domain as measured by ITC. The solid line represents the linear fit to all of the data whereas the dashed line is the fit to all the data except for the point that has the largest variance. While riboswitches containing the *metE* (a) and *lysC* (b) expression platforms show a strong correlation between  $T_{50}$  and  $K_D$ , that of *yitJ* is very weak (as judged from

the  $r^2$  of the fit).

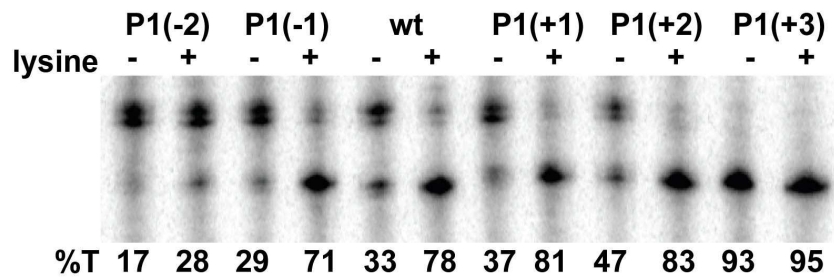

**Supplementary Figure 4.** Lysine-dependent transcriptional termination of the *B. subtilis* *lysC* lysine riboswitch as a function of the length of the P1 helix. Point mutations were introduced into the 5'-side of the P1 helix to either disrupt Watson-Crick pairs (P1(-1), P1(-2)) or introduced additional pairs (P1(+1), P1(+2), P1(+3)) (see sequence in Supplementary Table 1). Transcription reactions were performed in the absence (-) or presence (+) of lysine. For each RNA, the percent termination in the absence and presence (1mM) of the ligand are given as the average of three independent experiments.

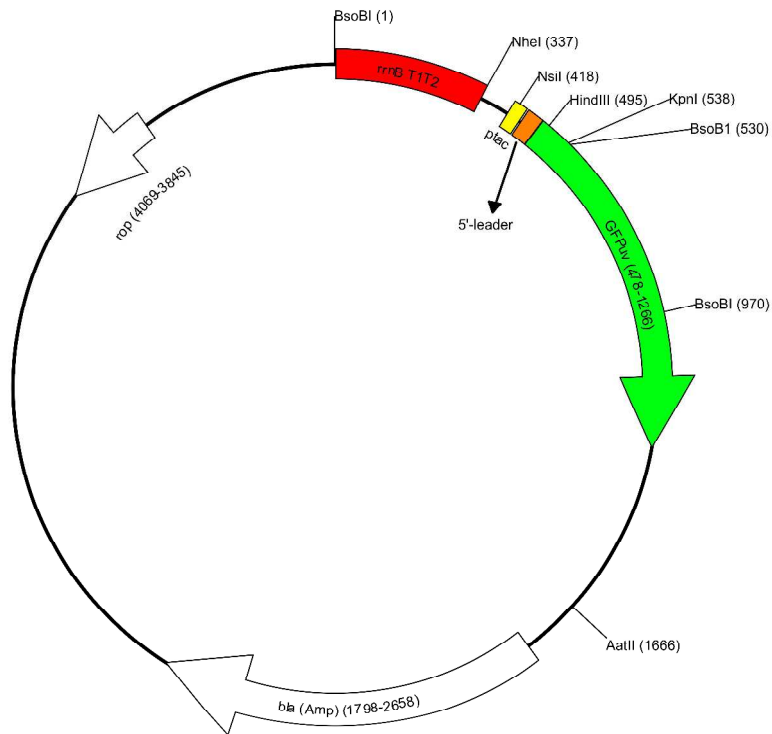

**Supplementary Figure 5.** Map of the parental riboswitch reporter plasmid (pRR1). The plasmid is derived from pBR322, from which the tetracycline resistance gene was removed and replaced with a gene encoding GFPuv (green) under control of a constitutively expressed *tac* promoter (yellow). The sequence immediately upstream of the *tac* promoter is an “insulator” sequence preceded by a strong *rrnB* T<sub>1</sub>T<sub>2</sub> terminator (red). All riboswitch leader sequences (orange) were cloned between the *Nsi*I and *Hind*III sites. The sequence of the full plasmid is given in Supplementary Table 2.



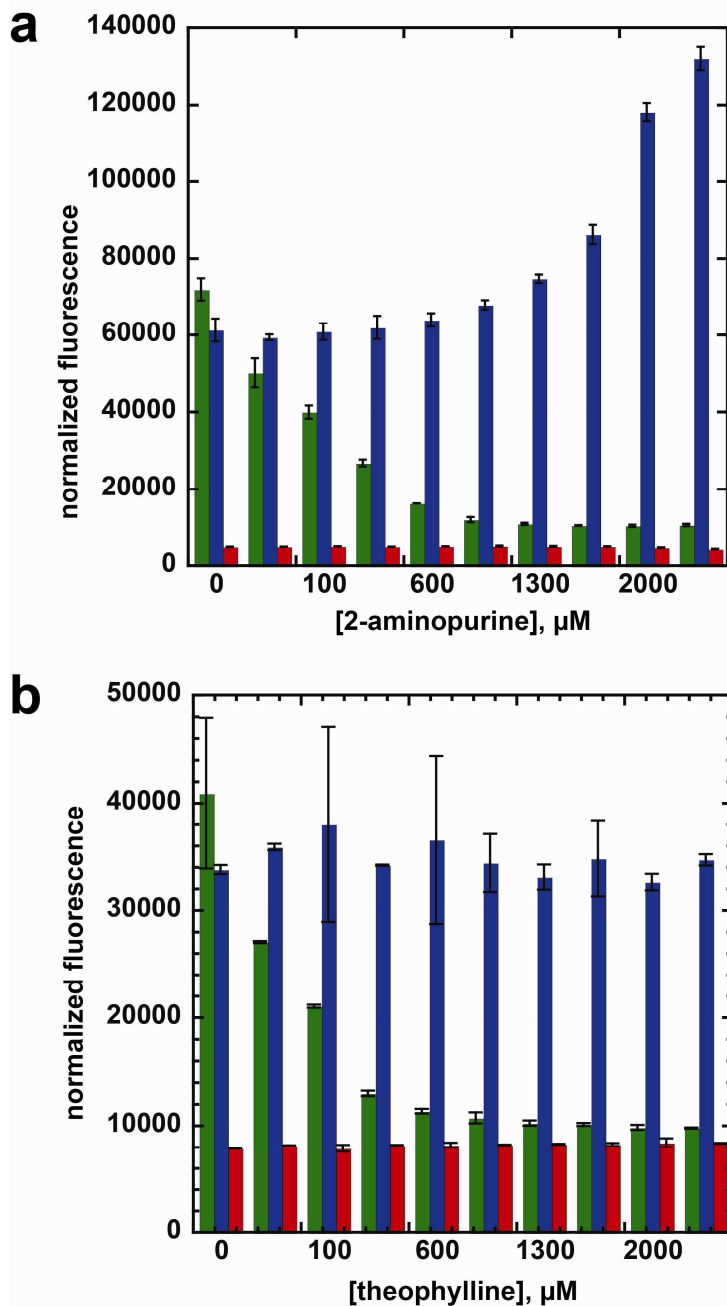

**Supplementary Figure 6.** Raw normalized fluorescence data for graphs shown in Figure 5b, d. (a) Raw normalized data for titration of the *xpt(C74U)/metE* (green) and *xpt(C74U,U51C)/metE* (blue) reporter with 2-aminopurine in the defined growth medium. Red bars represent the background fluorescence as measured using the parental pBR322 plasmid with no GFPuv reporter. Note that while the U51C negative control displays a ~2-fold increase in total fluorescence at high 2-AP concentrations, this transition occurs at higher 2-AP concentrations than the repression of the reporter. (b) Raw normalized data for titration of the *theo/metE* (green) and *theo(U24A)/metE* (blue) reporters with theophylline in the defined growth medium. Red bars represent the pBR322 background control. Error bars represent the standard deviation of at least 3 independent measurements.

**Supplementary Table 1:** Sequences of riboswitches and chimeras used in this study.

| Name                                            | Sequence <sup>1</sup>                                                                                                                                                                                                                                                                                                                                                          |
|-------------------------------------------------|--------------------------------------------------------------------------------------------------------------------------------------------------------------------------------------------------------------------------------------------------------------------------------------------------------------------------------------------------------------------------------|
| <b><i>lysC</i> expression platform chimeras</b> |                                                                                                                                                                                                                                                                                                                                                                                |
| <i>lysC</i> wild type                           | AATTCATAGTTAGATCGTGTTATATGGTGAAGATA GAGGTGCGAACT<br>TCAAGAGTATGCCTTTGGAGAAAAGATGGATTCTGTGAAAAAGGCTGAA<br>AGGGGAGCGTCGCCGAAGCAAATAAAACCCCATCGGTATTATTTGCTG<br>GCCGTGCATTGAATAAATGTAAGGCTGTCAAGAAATCATTCTTGGGA<br>GGGC TATCTCGTTGTT CATAATCATTATGATGATTAATTGATAAGCA<br>ATGAGAGTATTCCTCTCATTGCTTTTTTTTATTGTGGACAAAGCGCTCT<br>TTCTCCTCACCCGCACGAACCAAATGTAAGGGTGGTAATAC <b>ATG</b> |
| <i>lysC</i> (P1-3)                              | AATTCATAGTTAGATCGTGTTATATGGTGATCTTA GAGGTGCGAACT<br>TCAAGAGTATGCCTTTGGAGAAAAGATGGATTCTGTGAAAAAGGCTGAA<br>AGGGGAGCGTCGCCGAAGCAAATAAAACCCCATCGGTATTATTTGCTG<br>GCCGTGCATTGAATAAATGTAAGGCTGTCAAGAAATCATTCTTGGGA<br>GGGC TATCTCGTTGTT CATAATCATTATGATGATTAATTGATAAGCA<br>ATGAGAGTATTCCTCTCATTGCTTTTTTTTATTGTGGACAAAGCGCTCT<br>TTCTCCTCACCCGCACGAACCAAATGTAAGGGTGGTAATAC <b>ATG</b> |
| <i>lysC</i> (P1-2)                              | AATTCATAGTTAGATCGTGTTATATGGTGATCATA GAGGTGCGAACT<br>TCAAGAGTATGCCTTTGGAGAAAAGATGGATTCTGTGAAAAAGGCTGAA<br>AGGGGAGCGTCGCCGAAGCAAATAAAACCCCATCGGTATTATTTGCTG<br>GCCGTGCATTGAATAAATGTAAGGCTGTCAAGAAATCATTCTTGGGA<br>GGGC TATCTCGTTGTT CATAATCATTATGATGATTAATTGATAAGCA<br>ATGAGAGTATTCCTCTCATTGCTTTTTTTTATTGTGGACAAAGCGCTCT<br>TTCTCCTCACCCGCACGAACCAAATGTAAGGGTGGTAATAC <b>ATG</b> |
| <i>lysC</i> (P1-1)                              | AATTCATAGTTAGATCGTGTTATATGGTGATGATA GAGGTGCGAACT<br>TCAAGAGTATGCCTTTGGAGAAAAGATGGATTCTGTGAAAAAGGCTGAA<br>AGGGGAGCGTCGCCGAAGCAAATAAAACCCCATCGGTATTATTTGCTG<br>GCCGTGCATTGAATAAATGTAAGGCTGTCAAGAAATCATTCTTGGGA<br>GGGC TATCTCGTTGTT CATAATCATTATGATGATTAATTGATAAGCA<br>ATGAGAGTATTCCTCTCATTGCTTTTTTTTATTGTGGACAAAGCGCTCT<br>TTCTCCTCACCCGCACGAACCAAATGTAAGGGTGGTAATAC <b>ATG</b> |
| <i>lysC</i> (P1+1)                              | AATTCATAGTTAGATCGTGTTATATGGTGGAGATA GAGGTGCGAACT<br>TCAAGAGTATGCCTTTGGAGAAAAGATGGATTCTGTGAAAAAGGCTGAA<br>AGGGGAGCGTCGCCGAAGCAAATAAAACCCCATCGGTATTATTTGCTG<br>GCCGTGCATTGAATAAATGTAAGGCTGTCAAGAAATCATTCTTGGGA<br>GGGC TATCTCGTTGTT CATAATCATTATGATGATTAATTGATAAGCA<br>ATGAGAGTATTCCTCTCATTGCTTTTTTTTATTGTGGACAAAGCGCTCT<br>TTCTCCTCACCCGCACGAACCAAATGTAAGGGTGGTAATAC <b>ATG</b> |
| <i>lysC</i> (P1+2)                              | AATTCATAGTTAGATCGTGTTATATGGTCGAGATA GAGGTGCGAACT<br>TCAAGAGTATGCCTTTGGAGAAAAGATGGATTCTGTGAAAAAGGCTGAA<br>AGGGGAGCGTCGCCGAAGCAAATAAAACCCCATCGGTATTATTTGCTG<br>GCCGTGCATTGAATAAATGTAAGGCTGTCAAGAAATCATTCTTGGGA<br>GGGC TATCTCGTTGTT CATAATCATTATGATGATTAATTGATAAGCA<br>ATGAGAGTATTCCTCTCATTGCTTTTTTTTATTGTGGACAAAGCGCTCT<br>TTCTCCTCACCCGCACGAACCAAATGTAAGGGTGGTAATAC <b>ATG</b> |
| <i>lysC</i> (P1+3)                              | AATTCATAGTTAGATCGTGTTATATGGACGAGATA GAGGTGCGAACT<br>TCAAGAGTATGCCTTTGGAGAAAAGATGGATTCTGTGAAAAAGGCTGAA<br>AGGGGAGCGTCGCCGAAGCAAATAAAACCCCATCGGTATTATTTGCTG<br>GCCGTGCATTGAATAAATGTAAGGCTGTCAAGAAATCATTCTTGGGA<br>GGGC TATCTCGTTGTT CATAATCATTATGATGATTAATTGATAAGCA<br>ATGAGAGTATTCCTCTCATTGCTTTTTTTTATTGTGGACAAAGCGCTCT<br>TTCTCCTCACCCGCACGAACCAAATGTAAGGGTGGTAATAC <b>ATG</b> |

|                                          |                                                                                                                                                                                                                                                                                                                                                           |
|------------------------------------------|-----------------------------------------------------------------------------------------------------------------------------------------------------------------------------------------------------------------------------------------------------------------------------------------------------------------------------------------------------------|
| <i>metE/lysC</i>                         | AATTTTCATAGTTAGATCGTGTTATATGGTGAAGATAATCGAGAGTTGG<br>GCGAGGGATTGGCCTTTTGACCCCAACAGCAACCGACCCTAATACCAT<br>TGTGAAATGGGGCGCACTGCTTTTCGCGCCGAGACTGATGTCCTCATAA<br>GGCACGGTGCTAATTCATCAGATTGTGTCTGAGAGATATATCTCGTTG<br>TTCATAATCATTATGATGATTAATTGATAAGCAATGAGAGTATTCTT<br>CTCATTGCTTTTTTTATTGTGGACAAAGCGCTCTTTCTCCTCACCCGC<br>ACGAACCAAAATGTAAAGGGTGGTAATACATG |
| <i>yitJ/lysC</i>                         | AATTTTCATAGTTAGATCGTGTTATATGGTGAAGATA TCAAGAGAAGCA<br>GAGGGACTGGCCCGACGAAGCTTCAGCAACCGGTGTAATGGCGATCAG<br>CCATGACCAAGGTGCTAAATCCAGCAAGCTCGAACAGCTTGGAAGATA<br>TCTCGTTGTTTCATAATCATTATGATGATTAATTGATAAGCAATGAGA<br>GTATTCTCTCATTGCTTTTTTTATTGTGGACAAAGCGCTCTTTCTCC<br>TCACCCGCACGAACCAAAATGTAAAGGGTGGTAATACATG                                             |
| <i>xpt/lysC</i>                          | AATTTTCATAGTTAGATCGTGTTATATGGTGAAGATAATATAATCGCGT<br>GGATATGGCAGCAAGTTTCTACCGGGCACCGTAAATGTCCGACTATT<br>ATCTCGTTGTTTCATAATCATTATGATGATTAATTGATAAGCAATGAG<br>AGTATTCTCTCATTGCTTTTTTTATTGTGGACAAAGCGCTCTTTCTC<br>CTCACCCGCACGAACCAAAATGTAAAGGGTGGTAATACATG                                                                                                  |
| <i>xpt(C74U)/lysC</i>                    | AATTTTCATAGTTAGATCGTGTTATATGGTGAAGATAATATAATCGCGT<br>GGATATGGCAGCAAGTTTCTACCGGGCACCGTAAATGTCCGATTAATT<br>ATCTCGTTGTTTCATAATCATTATGATGATTAATTGATAAGCAATGAG<br>AGTATTCTCTCATTGCTTTTTTTATTGTGGACAAAGCGCTCTTTCTC<br>CTCACCCGCACGAACCAAAATGTAAAGGGTGGTAATACATG                                                                                                 |
| <i>ribD/lysC</i>                         | AATTTTCATAGTTAGATCGTGTTATATGGTGAAGATA TCGGGGCAGGGT<br>GGAAATCCCGACCGGCGGTAGTAAAGCACATTTGCTTTAGAGCCCGTG<br>ACCCGTGTGCATAAGCACGCGGTGGATTTCAGTTTAAGCTGAAGCCGAC<br>AGTCAAAGTCTGGATGGGAGATATCTCGTTGTTTCATAATCATTATGA<br>TGATTAATTGATAAGCAATGAGAGTATTCTCTCATTGCTTTTTTTAT<br>TGTGGACAAAGCGCTCTTTCTCCTCACCCGCACGAACCAAAATGTAAA<br>GGTGGTAATACATG                  |
| <i>theo/lysC</i>                         | AATTTTCATAGTTAGATCGTGTTATATGGTGAAGATAATACCAGCTTCG<br>AAAGAAGCCCTTGGCAGTATCTCGTTGTTTCATAATCATTATGATGAT<br>TAATTGATAAGCAATGAGAGTATTCTCTCATTGCTTTTTTTATTGTG<br>GACAAAGCGCTCTTTCTCCTCACCCGCACGAACCAAAATGTAAAGGGT<br>GGTAATACATG                                                                                                                               |
| <b>yitJ expression platform chimeras</b> |                                                                                                                                                                                                                                                                                                                                                           |
| <i>yitJ</i> wild type                    | CTTCCTGACACGAAAATTTTCATATCCGTTCTTA TCAAGAGAAGCAGAG<br>GGACTGGCCCGACGAAGCTTCAGCAACCGGTGTAATGGCGATCAGCCA<br>TGACCAAGGTGCTAAATCCAGCAAGCTCGAACAGCTTGGAAGATAAGA<br>AGAGACAAAATCACTGACAAAGTCTTCTTCTTAAGAGGACTTTTTTTA<br>TTTCTCTTTTTTCTTGCTGATGTGAATAAAGGAGGCAGACAATG                                                                                            |
| <i>metE/yitJ</i>                         | CTTCCTGACACGAAAATTTTCATATCCGTTCTTAATCGAGAGTTGGGCG<br>AGGGATTGGCCTTTTGACCCCAACAGCAACCGACCCTAATACCATTTGT<br>GAAATGGGGCGCACTGCTTTTCGCGCCGAGACTGATGTCCTCATAAGGC<br>ACGGTGCTAATTCATCAGATTGTGTCTGAGAGATAAGAAGAGACAA<br>AATCACTGACAAAGTCTTCTTCTTAAGAGGACTTTTTTTATTTCTCTT<br>TTTTCTTGGCTGATGTGAATAAAGGAGGCAGACAATG                                                |
| <i>xpt/yitJ</i>                          | CTTCCTGACACGAAAATTTTCATATCCGTTCTTAATATAATCGCGTGGGA<br>TATGGCAGCAAGTTTCTACCGGGCACCGTAAATGTCCGACTATTAAG<br>AAGAGACAAAATCACTGACAAAGTCTTCTTCTTAAGAGGACTTTTTTT<br>ATTTCTTTTTTTCTTGCTGATGTGAATAAAGGAGGCAGACAATG                                                                                                                                                 |
| <i>xpt(C74U)/yitJ</i>                    | CTTCCTGACACGAAAATTTTCATATCCGTTCTTAATATAATCGCGTGGGA<br>TATGGCAGCAAGTTTCTACCGGGCACCGTAAATGTCCGATTAATTAAG<br>AAGAGACAAAATCACTGACAAAGTCTTCTTCTTAAGAGGACTTTTTTT<br>ATTTCTTTTTTTCTTGCTGATGTGAATAAAGGAGGCAGACAATG                                                                                                                                                |

|                                          |                                                                                                                                                                                                                                                                                                                                              |
|------------------------------------------|----------------------------------------------------------------------------------------------------------------------------------------------------------------------------------------------------------------------------------------------------------------------------------------------------------------------------------------------|
| <i>lysC/yitJ</i>                         | CTTCCTGACACGAAAATTTTCATATCCGTTCTTAAGATAGAGGTGCGAA<br>CTTCAAGAGTATGCCTTTGGAGAAAAGATGGATTCTGTGAAAAAGGCTG<br>AAAGGGGAGCGTCGCCGAAGCAAATAAAACCCCATCGGTATTATTGCTG<br>TGGCCGTGCATTGAATAAATGTAAGGCTGTCAAGAAAATCATTTTCTTG<br>GAGGGCTATCTTAAGAAGAGACAAAATCACTGACAAAGTCTTCTTCTT<br>AAGAGGACTTTTTTTATTTCTCTTTTTTCTTGTGATGTGAATAAAG<br>GAGGCAGACAATG      |
| <i>ribD/yitJ</i>                         | CTTCCTGACACGAAAATTTTCATATCCGTTCTTAFCGGGGCAGGGTGGGA<br>AATCCCACCGCGGTAGTAAAGCACATTTGCTTTAGAGCCCGTGACC<br>CGTGTGCATAAGCACGCGGTGGATTAGTTTTAAGCTGAAGCCGACAGT<br>GAAAGTCTGGATGGGAGATAAGAAGAGACAAAATCACTGACAAAGTCT<br>TCTTCTTAAGAGGACTTTTTTTATTTCTCTTTTTTCTTGTGATGTG<br>AATAAAGGAGGCAGACAATG                                                       |
| <i>theo/yitJ</i>                         | CTTCCTGACACGAAAATTTTCATATCCGTTCTTAATACCAGCTTCGAAA<br>GAAGCCCTTGGCAGTAAGAAGAGACAAAATCACTGACAAAGTCTTCTT<br>CTTAAGAGGACTTTTTTTATTTCTCTTTTTTCTTGTGATGTGAATA<br>AAGGAGGCAGACAATG                                                                                                                                                                  |
| <b>metE expression platform chimeras</b> |                                                                                                                                                                                                                                                                                                                                              |
| <i>metE</i> wild type <sup>2</sup>       | CAAAAAATTAATAACATTTTCTCTTATCGAGAGTTGGGCGAGGGATTG<br>GCCTTTTGACCCCAACAGCAACCGACCGTAATACCATTGTGAAATGGG<br>GCGCACTGCTTTTCGCGCCGAGACTGATGTCTCATAAGGCACGGTGCT<br>AATTCCATCAGATTGTGTCTGAGAGATGAGAGAGGCAGTGTTTTACGT<br>AGAAAAGCCTCTTTCTCTCATGGGAAAGAGGCTTTTTGTTGTGAGAAA<br>ACCTCTTAGCAGCCTGTATCCGCGGGTGAAAGAGAGTGTTTTACATAT<br>AAAGGAGGAGAAACAATG   |
| <i>metE</i> (P1-2)                       | CAAAAAATTAATAACATGGTCTCTTATCGAGAGTTGGGCGAGGGATTG<br>GCCTTTTGACCCCAACAGCAACCGACCGTAATACCATTGTGAAATGGG<br>GCGCACTGCTTTTCGCGCCGAGACTGATGTCTCATAAGGCACGGTGCT<br>AATTCCATCAGATTGTGTCTGAGAGATGAGAGAGGCAGTGTTTTACGT<br>AGAAAAGCCTCTTTCTCTCATGGGAAAGAGGCTTTTTGTTGTGAGAAA<br>ACCTCTTAGCAGCCTGTATCCGCGGGTGAAAGAGAGTGTTTTACATAT<br>AAAGGAGGAGAAACAATG   |
| <i>metE</i> (P1-1)                       | CAAAAAATTAATAACATGTTTCTCTTATCGAGAGTTGGGCGAGGGATTG<br>GCCTTTTGACCCCAACAGCAACCGACCGTAATACCATTGTGAAATGGG<br>GCGCACTGCTTTTCGCGCCGAGACTGATGTCTCATAAGGCACGGTGCT<br>AATTCCATCAGATTGTGTCTGAGAGATGAGAGAGGCAGTGTTTTACGT<br>AGAAAAGCCTCTTTCTCTCATGGGAAAGAGGCTTTTTGTTGTGAGAAA<br>ACCTCTTAGCAGCCTGTATCCGCGGGTGAAAGAGAGTGTTTTACATAT<br>AAAGGAGGAGAAACAATG  |
| <i>metE</i> (P1+1)                       | CAAAAAATTAATAACA GTTTTCTCTTATCGAGAGTTGGGCGAGGGATTG<br>GCCTTTTGACCCCAACAGCAACCGACCGTAATACCATTGTGAAATGGG<br>GCGCACTGCTTTTCGCGCCGAGACTGATGTCTCATAAGGCACGGTGCT<br>AATTCCATCAGATTGTGTCTGAGAGATGAGAGAGGCAGTGTTTTACGT<br>AGAAAAGCCTCTTTCTCTCATGGGAAAGAGGCTTTTTGTTGTGAGAAA<br>ACCTCTTAGCAGCCTGTATCCGCGGGTGAAAGAGAGTGTTTTACATAT<br>AAAGGAGGAGAAACAATG |
| <i>metE</i> (P1+2)                       | CAAAAAATTAATAAC TGGTTTCTCTTATCGAGAGTTGGGCGAGGGATTG<br>GCCTTTTGACCCCAACAGCAACCGACCGTAATACCATTGTGAAATGGG<br>GCGCACTGCTTTTCGCGCCGAGACTGATGTCTCATAAGGCACGGTGCT<br>AATTCCATCAGATTGTGTCTGAGAGATGAGAGAGGCAGTGTTTTACGT<br>AGAAAAGCCTCTTTCTCTCATGGGAAAGAGGCTTTTTGTTGTGAGAAA<br>ACCTCTTAGCAGCCTGTATCCGCGGGTGAAAGAGAGTGTTTTACATAT<br>AAAGGAGGAGAAACAATG |

|                        |                                                                                                                                                                                                                                                                                                                                                                       |
|------------------------|-----------------------------------------------------------------------------------------------------------------------------------------------------------------------------------------------------------------------------------------------------------------------------------------------------------------------------------------------------------------------|
| <i>yitJ/metE</i>       | CAAAAAATTAATAACATTTTCTCTTTC AAGAGAAGCAGAGGGACTGGC<br>CCGACGAAGCTTCAGCAACCGGTGTAATGGCGATCAGCCATGACCAAG<br>GTGCTAAATCCAGCAAGCTCGAACAGCTTGAAGA GAGAGAGGCAGTG<br>TTTTACGTAGAAAAGCCTCTTTCTCTCATGGGAAAGAGGCTTTTT GTT<br>GTGAGAAAACCTCTTAGCAGCCTGTATCCGCGGGTGAAAGAGAGTGT<br>TTACATATAAAGGAGGAGAAACA ATG                                                                      |
| <i>xpt/metE</i>        | CAAAAAATTAATAACATTTTCTCTT ATATAATCGCGTGGATATGGCAC<br>GCAAGTTTCTACCGGGCACCCTAAATGTCCGACTAT GAGAGAGGCAGT<br>GTTTTACGTAGAAAAGCCTCTTTCTCTCATGGGAAAGAGGCTTTTT GT<br>TGTGAGAAAACCTCTTAGCAGCCTGTATCCGCGGGTGAAAGAGAGTGT<br>TTTACATATAAAGGAGGAGAAACA ATG                                                                                                                       |
| <i>xpt/metE (P1-2)</i> | CAAAAAATTAATAACAT GGTCTCTT ATATAATCGCGTGGATATGGCAC<br>GCAAGTTTCTACCGGGCACCCTAAATGTCCGACTAT GAGAGAGGCAGT<br>GTTTTACGTAGAAAAGCCTCTTTCTCTCATGGGAAAGAGGCTTTTT GT<br>TGTGAGAAAACCTCTTAGCAGCCTGTATCCGCGGGTGAAAGAGAGTGT<br>TTTACATATAAAGGAGGAGAAACA ATG                                                                                                                      |
| <i>xpt/metE (P1-1)</i> | CAAAAAATTAATAACAT GTTCTCTT ATATAATCGCGTGGATATGGCAC<br>GCAAGTTTCTACCGGGCACCCTAAATGTCCGACTAT GAGAGAGGCAGT<br>GTTTTACGTAGAAAAGCCTCTTTCTCTCATGGGAAAGAGGCTTTTT GT<br>TGTGAGAAAACCTCTTAGCAGCCTGTATCCGCGGGTGAAAGAGAGTGT<br>TTTACATATAAAGGAGGAGAAACA ATG                                                                                                                      |
| <i>xpt/metE (P1+1)</i> | CAAAAAATTAATAACA GTTCTCTT ATATAATCGCGTGGATATGGCAC<br>GCAAGTTTCTACCGGGCACCCTAAATGTCCGACTAT GAGAGAGGCAGT<br>GTTTTACGTAGAAAAGCCTCTTTCTCTCATGGGAAAGAGGCTTTTT GT<br>TGTGAGAAAACCTCTTAGCAGCCTGTATCCGCGGGTGAAAGAGAGTGT<br>TTTACATATAAAGGAGGAGAAACA ATG                                                                                                                       |
| <i>xpt/metE (P1+2)</i> | CAAAAAATTAATAAC TGTCTCTT ATATAATCGCGTGGATATGGCAC<br>GCAAGTTTCTACCGGGCACCCTAAATGTCCGACTAT GAGAGAGGCAGT<br>GTTTTACGTAGAAAAGCCTCTTTCTCTCATGGGAAAGAGGCTTTTT GT<br>TGTGAGAAAACCTCTTAGCAGCCTGTATCCGCGGGTGAAAGAGAGTGT<br>TTTACATATAAAGGAGGAGAAACA ATG                                                                                                                        |
| <i>xpt(C74U)/metE</i>  | CAAAAAATTAATAACATTTTCTCTT ATATAATCGCGTGGATATGGCAC<br>GCAAGTTTCTACCGGGCACCCTAAATGTCCGAT TAT GAGAGAGGCAGT<br>GTTTTACGTAGAAAAGCCTCTTTCTCTCATGGGAAAGAGGCTTTTT GT<br>TGTGAGAAAACCTCTTAGCAGCCTGTATCCGCGGGTGAAAGAGAGTGT<br>TTTACATATAAAGGAGGAGAAACA ATG                                                                                                                      |
| <i>lysC/metE</i>       | CAAAAAATTAATAACATTTTCTCTT AGATAGAGGTGCGAACTTCAAGA<br>GTATGCCTTTGGAGAAAGATGGATTCTGTGAAAAAGGCTGAAAGGGGA<br>GCGTCGCCGAAGCAAATAAAACCCCATCGGTATTATTTGCTGGCCGTG<br>CATTGAATAAATGTAAGGCTGTCAAGAAATCATTTTCTTGGAGGGCTA<br>TCTGAGAGAGGCAGTGTTTTACGTAGAAAAGCCTCTTTCTCTCATGGG<br>AAAGAGGCTTTTT GTTGTGAGAAAACCTCTTAGCAGCCTGTATCCGCG<br>GGTGAAAGAGAGTGTTTTACATATAAAGGAGGAGAAACA ATG |
| <i>ribD/metE</i>       | CAAAAAATTAATAACATTTTCTCTT TCGGGCAGGGTGGAAATCCCGA<br>CCGGCGGTAGTAAAGCACATTTGCTTTAGAGCCCGTGACCCGTGTGCA<br>TAAGCACGCGGTGGATTTCAGTTTAAGCTGAAGCCGACAGTGAAAGTCT<br>GGATGGGAGAGAGAGAGGCAGTGTTTTACGTAGAAAAGCCTCTTTCTC<br>TCATGGGAAAGAGGCTTTTT GTTGTGAGAAAACCTCTTAGCAGCCTGT<br>ATCCGCGGGTGAAAGAGAGTGTTTTACATATAAAGGAGGAGAAACA AT<br>G                                          |
| <i>theo/metE</i>       | CAAAAAATTAATAACATTTTCTCTT ATACCAGCTTCGAAAGAAGCCCT<br>TGGCAG GAGAGAGGCAGTGTTTTACGTAGAAAAGCCTCTTTCTCTCAT<br>GGGAAAGAGGCTTTTT GTTGTGAGAAAACCTCTTAGCAGCCTGTATCC<br>GCGGGTGAAAGAGAGTGTTTTACATATAAAGGAGGAGAAACA ATG                                                                                                                                                         |

|                        |                                                                                                                                                                                                                                     |
|------------------------|-------------------------------------------------------------------------------------------------------------------------------------------------------------------------------------------------------------------------------------|
| <i>tet/metE</i>        | CAAAAAATTAATAACATTTTCTCTTGGGAGAGGTGAAGAATACGACCA<br>CCTAGGTAGAAATACCTAAAACATACCCGAGAGAGGCAGTGTTTTACG<br>TAGAAAAGCCTCTTTCTCTCATGGGAAAGAGGCTTTTTGTTGTGAGAA<br>AACCTCTTAGCAGCCTGTATCCGCGGGTGAAAGAGAGTGTTTTACATA<br>TAAAGGAGGAGAAACAATG |
| <i>tet/metE</i> (P1-1) | CAAAAAATTAATAACATTTACTCTTGGGAGAGGTGAAGAATACGACCA<br>CCTAGGTAGAAATACCTAAAACATACCCGAGAGAGGCAGTGTTTTACG<br>TAGAAAAGCCTCTTTCTCTCATGGGAAAGAGGCTTTTTGTTGTGAGAA<br>AACCTCTTAGCAGCCTGTATCCGCGGGTGAAAGAGAGTGTTTTACATA<br>TAAAGGAGGAGAAACAATG |
| <i>tet/metE</i> (P1-2) | CAAAAAATTAATAACATTTAGTCTTGGGAGAGGTGAAGAATACGACCA<br>CCTAGGTAGAAATACCTAAAACATACCCGAGAGAGGCAGTGTTTTACG<br>TAGAAAAGCCTCTTTCTCTCATGGGAAAGAGGCTTTTTGTTGTGAGAA<br>AACCTCTTAGCAGCCTGTATCCGCGGGTGAAAGAGAGTGTTTTACATA<br>TAAAGGAGGAGAAACAATG |
| <i>tet/metE</i> (P1-3) | CAAAAAATTAATAACATTTAGGCTTGGGAGAGGTGAAGAATACGACCA<br>CCTAGGTAGAAATACCTAAAACATACCCGAGAGAGGCAGTGTTTTACG<br>TAGAAAAGCCTCTTTCTCTCATGGGAAAGAGGCTTTTTGTTGTGAGAA<br>AACCTCTTAGCAGCCTGTATCCGCGGGTGAAAGAGAGTGTTTTACATA<br>TAAAGGAGGAGAAACAATG |

<sup>1</sup>The coloring scheme for the sequences is as follows: cyan, expression platform; green, aptamer domain; red, ATG start codon of first coding region; yellow, mutation introduced to a wild type sequence.

<sup>2</sup>The “wildtype” *metE* sequence used in this paper starts at the +11 nucleotide of the predicted start site of the *metE* transcript.

## Supplementary Table 2: Complete sequence of pRR1

CTCGGGTTGCCTGGCGGCAGTAGCGCGGTGGTCCCACCTGACCCCATGCCGAACCTCAGAAGTGAA  
ACGCCGTAGCGCCGATGGTAGTGTGGGGTCTCCCCATGCGAGAGTAGGGAACCTGCCAGGCATCAA  
ATAAAACGAAAGGCTCAGTCGAAAGACTGGGCCTTTCGTTTTATCTGTTGTTTGTGCGGTGAACGC  
TCTCCTGAGTAGGACAAATCCGCCGGGAGCGGATTTGAACGTTGCGAAGCAACGGCCCCGGAGGGT  
GGCGGGCAGGACGCCCGCCATAAACTGCCAGGCATCAAATTAAGCAGAAGGCCATCCTGACGGAT  
GGCCTTTTTGCGCTAGCCACAGCTAACACCACGTCGTCCTTATCTGCTGCCCTAGGTCTATGAGT  
GGTTGCTGGATAACTTGACAGGCATGCATAAGGCTCGTATAATATATTCAGGGAGACCACAACGG  
TTTCCAAGAAGGAGATATACCATGACCATGATTACGCCAAGCTTGCATGCCTGCAGGTCGACTC  
TAGAGGATCCCCGGGTACCGGTAGAAAAAATGAGTAAAGGAGAAGAAGCTTTTCACTGGAGTTGTC  
CCAATCTTGTGTAATTAGATGGTGATGTTAATGGGCACAAATTTCTGTGTCAGTGAGAGGGTGA  
AGGTGATGCAACATACGAAAACTTACCCTTAAATTTATTTGCACTACTGAAAACTACCTGTTT  
CATGGCCAACACTTGTCACTACTTTCTCTTATGGTGTTCAATGCTTTTCCCGTTATCCGGATCAT  
ATGAAACGGCATGACTTTTTCAAGAGTGCCATGCCCGAAGGTTATGTACAGGAACGCCTATATC  
TTTTCAAAGATGACGGGAACATAAGACGCGTGCTGAAGTCAAGTTTGAAGGTGATACCCTTGTTA  
ATCGTATCGAGTTAAAAGGTATTGATTTTTAAAGAAGATGGAAACATTCTCGGACACAAACTCGAG  
TACAACATAACTCACACAATGTATACATCACGGCAGACAAACAAAAGAATGGAATCAAAGCTAA  
CTTCAAAATTCGCCACAACATTGAAGATGGATCCGTTCAACTAGCAGACCATTATCAACAAAATA  
CTCCAATTGGCGATGGCCCTGTCTTTTTACCAGACAACCATTACCTGTGACACAATCTGCCCTT  
TCGAAAGATCCCAACGAAAAGCGTGACCACATGGTCTTCTTGAGTTTGTAAGTGTGCTGCTGGGAT  
TACACATGGCATGGATGAGCTCTACAAATAATGAATTTCAACTGAGCGCCGGTGCCTACCATTAC  
CAACTTGTCTGGTGTCAAAAATAATAGGCCCTACTAGTCGGCCGTACGGGCCCTTTCGTCTCGCGC  
GTTTTCGGTGATGACGGTGA AAAACCTCTGACACATGCAGCTCCCGGAGACGGTCACAGCTTGTCTG  
TAAGCGGATGCCGGGAGCAGACAAGCCCCTCAGGGCGCGTCAAGCGGGTGTGGCGGGTGTGCGGG  
CTGGCTTAACTATGCGGCATCAGAGCAGATTGTAAGTGCAGAGTGCACCATATGCGGTGTGAAATAC  
CGCACAGATGCGTAAGGAGAAAATACCGCATCAGGCGGCCTTAAAGGGCCTCGTGATACGCCTATT  
TTTATAGTTAATGTCATGATAATAATGGTTTTCTTAGACGTCAAGTGGCACTTTTCGGGGAAATG  
TGCGCGGAACCCCTATTTGTTTTATTTTTCTAAATACATTCAAATATGTATCCGCTCATGAGACAA  
TAACCCTGATAAATGCTTCAATAATATTGAAAAAGGAAGAGTATGAGTATTCAACATTTCCGTGT  
CGCCCTTATTCCTTTTTTGCGGCATTTCCTTCTGTTTTTGTCTACCCAGAAACGCTGGTGA  
AAGTAAAAGATGCTGAAGATCAGTTGGGTGCACGAGTGGGTTACATCGAACTGGATCTCAACAGC  
GGTAAGATCCTTGAGAGTTTTTCGCCCGAAGAACGTTTTTCCAATGATGAGCACTTTTAAAGTTCT  
GCTATGTGGCGCGGTATTATCCCGTGTGACGCGGGCAAGAGCAACTCGGTGCGCCGATACACT  
ATTCTCAGAATTGACTTGGTTGAGTACTACCAGTACAGAAAAGCATCTTACGGATGGCATGACA  
GTAAGAGAATTATGCACTGCTGCCATAACCATGAGTGATAAACACTGCGGCCAATTACTTCTGAC  
AACGATCGGAGGACCGAAGGAGCTAACCGCTTTTTTGCACAACATGGGGGATCATGTAAGTCCGC  
TTGATCGTTGGGAACCGGAGCTGAATGAAGCCATACCAAACGACGAGCGTGACACCACGATGCCT  
GCAGCAATGGCAACAACGTTGCGCAAACCTATTAAGTGGCGAACTACTTACTCTAGCTTCCCGGCA  
ACAATTAATAGACTGGATGGAGGCGGATAAAGTTGCAGGACCCTTCTGCGCTCGGCCCTTCCGG  
CTGGCTGGTTTTATTGCTGATAAATCTGGAGCCGGTGAGCGTGGGTCTCGCGGTATCATTGCAGCA  
CTGGGGCCAGATGGTAAGCCCTCCCGTATCGTAGTTATCTACACGACGGGGAGTCAGGCAACTAT  
GGATGAACGAAATAGACAGATCGCTGAGATAGGTGCCTCACTGATTAAGCATTGGTAACTGTCAG  
ACCAAGTTTACTCATATATACTTTAGATTGATTTAAAACCTTCATTTTTAATTTAAAAGGATCTAG  
GTGAAGATCCTTTTTGATAATCTCATGACCAAAAATCCCTAACGTGAGTTTTTCGTTCCACTGAGC  
GTCAGACCCCGTAGAAAAGATCAAAGGATCTTCTGAGATCCTTTTTTCTGCGGTAATCTGCT  
GCTTGCAAACAAAAAACACCCTACCAGCGGTGGTTTTGTTTGGCGGATCAAGAGCTACCAACT  
CTTTTCCGAAGGTAACCTGGCTTACGACAGCGCAGATACCAAATACTGTCTCTAGTGTAGCC  
GTAGTTAGGCCACCCTTCAAGAACTCTGTAGCACCGCTACATACCTCGCTCTGCTAATCCTGT  
TACCAGTGGCTGCTGCCAGTGGCGATAAGTCGTGCTTACCAGGGTTGGACTCAAGACGATAGTTA  
CCGGATAAGGCGCAGCGGTGCGGCTGAACGGGGGGTTCGTGCACACAGCCAGCTTGGAGCGAAC  
GACCTACCCGAACTGAGATACCTACAGCGTGAGCTATGAGAAAAGCGCCACGCTTCCCGAAGGGA  
GAAAGGCGGACAGGTATCCGGTAAGCGGCAGGGTCCGGAACAGGAGAGCGCACGAGGGAGCTTCCA  
GGGGGAAACGCCTGGTATCTTTATAGTCTGTGCGGTTTTCGCCACCTCTGACTTGAGCGTGCATT  
TTTTGTGATGCTCGTCAGGGGGCGGAGCCTATGGAAAACGCCAGCAACGCGGCCTTTTTACGGT  
TCCTGGCCTTTTTGCTGGCCTTTTTGCTCACATGTTCTTTCCTGCGTTATCCCTGATTCTGTGGAT  
AACCGTATTACCGCCTTTGAGTGAGCTGATACCGCTCGCCGAGCCGAACGACCGAGCGCAGCGA

GTCAGTGAGCGAGGAAGCGGAAGAGCGCCTGATGCGGTATTTTCTCCTTACGCATCTGTGCGGTA  
TTTCACACCGCATATGGTGCCTCTCAGTACAATCTGCTCTGATGCCGCATAGTTAAGCCAGTAT  
ACACTCCGCTATCGCTACGTGACTGGGTCATGGCTGCGCCCCGACACCCGCCAACACCCGCTGAC  
GCGCCCTGACGGGCTTGTCTGCTCCCGGCATCCGCTTACAGACAAGCTGTGACCGTCTCCGGGAG  
CTGCATGTGTTCAGAGGTTTTACCGTCATCACCGAAACGCGCGAGGCAGCTGCGGTAAAGCTCAT  
CAGCGTGGTCGTGAAGCGATTACAGATGTCTGCCTGTTTCATCCGCGTCCAGCTCGTTGAGTTTC  
TCCAGAAGCGTTAATGTCTGGCTTCTGATAAAGCGGGCCATGTTAAGGGCGGTTTTTTCCTGTTT  
GGTCACTGATGCCTCCGTGTAAGGGGGATTTCTGTTTCATGGGGGTAATGATACCGATGAAACGAG  
AGAGGATGCTCACGATACGGGTTACTGATGATGAACATGCCCGGTTACTGGAACGTTGTGAGGGT  
AAACAACGGCGGTATGGATGCGGCGGGACCAGAGAAAAATCACTCAGGGTCAATGCCAGCGCTT  
CGTTAATACAGATGTAGGTGTTCCACAGGGTAGCCAGCAGCATCCTGCGATGCAGATCCGGAACA  
TAATGGTGCAGGGCGCTGACTTCCGCGTTTTCCAGACTTTACGAAACACGGAAACCGAAGACCATT  
CATGTTGTTGCTCAGGTCGCAGACGTTTTGCAGCAGCAGTCGCTTACGTTTCGCTCGCGTATCGG  
TGATTCATTCTGCTAACCAGTAAGGCAACCCCGCCAGCCTAGCCGGGTCCTCAACGACAGGAGCA  
CGATCATGCGCACCCGTGGCCAGGACCCAACGCTG



**Supplementary Table 3:** Defined medium used in this study.

**Trace metals solution:**

|                                                     |           |
|-----------------------------------------------------|-----------|
| HCl                                                 | 10% v/v   |
| FeCl <sub>3</sub> -6H <sub>2</sub> O                | 10 mg/mL  |
| ZnCl <sub>2</sub> -4H <sub>2</sub> O                | 2 mg/mL   |
| CoCl <sub>2</sub> -6H <sub>2</sub> O                | 2 mg/mL   |
| Na <sub>2</sub> MoO <sub>4</sub> -2H <sub>2</sub> O | 2 mg/mL   |
| CaCl <sub>2</sub> -2H <sub>2</sub> O                | 1 mg/mL   |
| CuCl <sub>2</sub>                                   | 1 mg/mL   |
| MnCl <sub>2</sub>                                   | 1 mg/mL   |
| H <sub>3</sub> BO <sub>3</sub>                      | 0.5 mg/mL |

**CSB supplement:**

|                        |            |
|------------------------|------------|
| Glucose                | 20% (w/v)  |
| 0.5 M disodium citrate | 67 mg/mL   |
| Trace metals solution  | 10% v/v    |
| MgSO <sub>4</sub>      | 3.3 mg/ml  |
| Thiamine               | 0.33 mg/mL |

**CSB salts:**

|                                                 |       |
|-------------------------------------------------|-------|
| NaH <sub>2</sub> PO <sub>4</sub>                | 37 mM |
| K <sub>2</sub> HPO <sub>4</sub>                 | 66 mM |
| (NH <sub>4</sub> ) <sub>2</sub> SO <sub>4</sub> | 15 mM |

**CSB Media:**

|                              |        |
|------------------------------|--------|
| CSB salts                    | 500 ml |
| CSB supplement               | 15 ml  |
| 10% Casamino acids (sterile) | 5 ml   |
